# Supplementary material for: Gender disparity in the associations of overweight/obesity with occupational activity, transport to/from work, leisure-time physical activity, and leisure-time spent sitting in working adults: A cross-sectional study
Source: PubMed Central journal article supplement (PMC5565757; doi:10.1016/j.je.2016.08.019), 2017-08-01
Supplement: mmc1.pdf [file mmc1.pdf]

**eTable 1.** Adjusted odds ratio (OR) and 95% confidence interval (CI) of overall or abdominal overweight/obesity by leisure-time physical activity, leisure-time sitting, transport to/from work, and occupational activity category in working adults in the 2009-2010 Zhejiang Metabolic Syndrome Prevalence Survey, China

| Variable                       | Total        |             | Overweight/obesity <sup>d</sup> |                                     |
|--------------------------------|--------------|-------------|---------------------------------|-------------------------------------|
|                                | N (%)        | N (%)       | OR <sup>e</sup> (95% CI)        | OR <sup>f</sup> (95% CI)            |
| Total                          | 6739 (100.0) |             |                                 |                                     |
| Transport to/from work         |              |             |                                 |                                     |
| Any passive                    | 5370 (79.7)  | 2585 (78.8) | 1.00                            | 1.00                                |
| Walking                        | 752 (11.2)   | 386 (11.8)  | 1.03 (0.88–1.21)                | 1.05 (0.88–1.25)                    |
| Cycling                        | 617 (9.1)    | 309 (9.4)   | 0.92 (0.77–1.10)                | 0.94 (0.78–1.13)                    |
| Leisure-time physical activity |              |             |                                 |                                     |
| 0-149 min/week                 | 6234 (92.5)  | 2992 (91.2) | 1.00                            | 1.00                                |
| ≥150 min/week                  | 505 (7.5)    | 288 (8.8)   | <b>0.72 (0.60–0.87)</b>         | <b>0.74 (0.60–0.91)<sup>j</sup></b> |
| Leisure-time sitting           |              |             |                                 |                                     |
| ≥4 h/day                       | 836 (12.4)   | 411 (13.2)  | 1.00                            | 1.00                                |
| 2.5 to < 4 h/day               | 2187 (32.5)  | 1040 (33.3) | 0.92 (0.79–1.08)                | 0.92 (0.79–1.09)                    |
| <2.5 h/day                     | 3399 (50.4)  | 1669 (53.5) | 0.92 (0.78–1.08)                | 0.92 (0.78–1.08)                    |
| Occupational activity          |              |             |                                 |                                     |
| Light                          | 3117 (46.3)  | 1512 (46.1) | 1.00                            | 1.00                                |
| Moderate                       | 2787 (41.4)  | 1351 (41.2) | 0.93 (0.83–1.03)                | 0.91 (0.81–1.03)                    |
| Heavy                          | 835 (12.4)   | 417 (12.7)  | <b>0.82 (0.69–0.96)</b>         | <b>0.83 (0.70–0.98)<sup>k</sup></b> |

<sup>d</sup> Measured by WHO cut-offs

<sup>e</sup> Adjusted for age and sex

<sup>f</sup> Adjusted for age, sex, educational level, daily total caloric intake, smoking, drinking, district economic level, occupational activity, leisure-time physical activity, leisure-time sitting, and transportation to/from work

<sup>j</sup>: Interactive OR= 0.74 (0.67-0.81)

<sup>k</sup>: Interactive OR= 0.83 (0.76-0.92)
